# Supplementary material for: Ru nanoclusters anchored on boron- and nitrogen-doped carbon for a highly efficient hydrogen evolution reaction in alkaline seawater
Source: Royal Society of Chemistry journal article supplement (doi:10.1039/d3nr05052a), 2023-01-01
Supplement: d3nr05052a1.pdf [file d3nr05052a1.pdf]

## Supporting information for

### **Ru nanoclusters anchored on boron and nitrogen doped carbon for highly efficient hydrogen evolution reaction in alkaline seawater**

Binbin Jiang<sup>a</sup>, Zhen Wang<sup>1a</sup>, Hui Zhao<sup>a</sup>, Xie Wang<sup>a</sup>, Xiaoxia Mao<sup>a</sup>, Aijian Huang<sup>b\*</sup>, Xuehua Zhou<sup>a</sup>, Kui Yin<sup>c\*</sup>, Kefa Sheng<sup>a</sup>, Junwei Wang<sup>a\*</sup>

a Anhui Key Laboratory of Photoelectric-Magnetic Functional Materials, Anhui Key Laboratory of Functional Coordination Compounds, School of Chemistry and Chemical Engineering, Anqing Normal University, Anqing 246011, China

b School of Electronics Science and Engineering, University of Electronic Science and Technology of China, Chengdu, 610054, China.

c Jiangsu Key Laboratory for Carbon-Based Functional Materials & Devices, Institute of Functional Nano & Soft Materials (FUNSOM), Soochow University, Suzhou, 215123, PR China

## **Experimental section**

### **1.1 Materials**

$\text{RuCl}_3 \cdot x\text{H}_2\text{O}$ , dicyandiamide, boracic acid, soluble starch and hydrogen fluoride were purchased from Sinopharm Chemical Reagent Co. Ltd. The Nafion (5 wt %) was obtained from Sigma-Aldrich Co. The commercial Pt/C (20 wt% Pt loaded on the carbon black) catalysts were obtained from Alfa Aesar Co. Silica nanospheres ( $\text{SiO}_2$ , 12 nm) was purchased from Shanghai Macklin Biochemical Co., Ltd. Other reagents were analytical reagent grade without further purification. Doubly distilled water was used throughout the experiments (Resistivity > 18.2 M $\Omega$  cm).

### **1.2 Synthesis of boron and nitrogen doped carbon, nitrogen doped carbon, boron doped carbon and carbon**

Boron and nitrogen doped carbon (NBC) was obtained according to followed procedure: dicyandiamide, boracic acid, soluble starch and  $\text{SiO}_2$  are added in 30 mL deionized water with continue stirring for 5 h. After stirring, the products was achieved by freeze-drying technique over 24 h. The achieved precursors was annealing at 500 °C for 3 h at Ar atmosphere with a heating rate of 2 °C/min. Subsequently, the temperature was increased to 900 °C for 3 h with a heating rate of 2 °C/min. After cool naturally, the black powder was named as  $\text{SiO}_2$ @NBC. The obtained  $\text{SiO}_2$ @NBC was treated with NaOH to remove the  $\text{SiO}_2$ . Following this, the black powders were washed by water and dried by freeze-drying, respectively. The lastly, the preparation of NBC was heat treatment at 600 °C for 2 h under  $\text{H}_2/\text{Ar}$  (v/v, 5%  $\text{H}_2$ ) with a heating rate of 2 °C/min. The nitrogen doped carbon (NC), boron doped carbon (BC) and carbon (C) were obtained based on same method.

### **1.3 Synthesis of Ru nanoparticle/boron and nitrogen doped carbon**

Ru/NBC was annealed at 500 °C under Ar atmosphere for 2 h with a heating rate of 5 °C/min, the achieved composite was named as Ru nanoparticle/NBC (Ru/NBC).

### **1.4 Materials characterizations**

The phase and crystallography of catalysts were characterized by X-ray powder diffraction (XRD, Rigaku Ulitma IV diffractometer) with Cu  $K\alpha$  radiation ( $\lambda = 0.15406$  nm). Scanning electron microscopy (SEM) was carried out by using a Zeiss Supra 55. The transmission electron microscope (TEM), high angle annular dark field scanning transmission electron microscopy (HAADF-STEM) and elemental mapping by Energy-dispersive X-ray spectrometry (EDS) were employed to characterize the catalysts with a FEI Tecnai F20 transmission electron microscope (accelerating voltage is 200 kV). High resolution HAADF-STEM was executed on FEI titan themis 200 with spherical aberration corrector. The

chemical states of catalysts were studied using the X-ray photoelectron spectroscopy (XPS) measurement performed on Escalab 250Xi with Al K $\alpha$  radiation (1486 eV) as a probe.

### 1.5 Details of computational calculations

All of the calculations were performed by means of spin polarized density functional theory (DFT) methods using the Vienna Ab initio Simulation Package (VASP).<sup>S1</sup> While the projector augmented wave (PAW) method was adopted to describe electron-ion interaction.<sup>S2</sup> The Perdew-Burke-Ernzerhof (PBE) exchange-correlation functional within a generalized gradient approximation (GGA) was employed, and a 520 eV cut off energy for the plane-wave basis set was used for the valence electrons. The self-consistent field (SCF) calculations were performed with an energy and force convergence criterion of  $10^{-5}$  eV and  $0.02$  eV  $\text{\AA}^{-1}$ , respectively. And the intrinsic dipole correction was also considered in all DFT calculations. The Brillouin zone was sampled using the  $2 \times 2 \times 1$  Monkhorst-Pack sampling in structure optimization for periodically repeated metal slabs with maximum symmetry applied to reduce the number of k-points in the calculations. To avoid the interactions between two adjacent periodic images, the vacuum thickness was set to be  $15$   $\text{\AA}$ . The atomic structures were analyzed by using the VESTA code. <sup>S3</sup>

The integral adsorption energy for H atoms is defined by:

$$\Delta E_{\text{H}} = E(\text{surface} + \text{H}) - E(\text{surface}) - \frac{1}{2}E(\text{H}_2) \quad (1)$$

where the  $E(\text{surface} + \text{H})$  and  $E(\text{surface})$  are the total energy of metal surface with H atoms adsorption and without, respectively.  $E(\text{H}_2)$  is the total energy of hydrogen molecule in the gaseous phase. The Gibbs free energy of H atoms ( $\Delta G_{\text{H}}$ ) is an important parameter for the descriptor of HER activity:

$$\Delta G_{\text{H}} = \Delta E_{\text{H}} + \Delta \text{ZPE} - T\Delta S \quad (2)$$

where ZPE is the zero-point vibrational energy using the harmonic approximation, T is the kelvin temperature, and S is the entropy. According to thermodynamics, large positive values of  $\Delta G_{\text{H}}$  indicate that the hydrogen atom is difficult to bind to the catalytic sites, whereas large negative values of  $\Delta G_{\text{H}}$  indicate that molecular hydrogen is difficult to be released from the catalytic site.<sup>S4</sup> Therefore, tuning the  $\Delta G_{\text{H}}$  approaching to zero is favorable for catalyst performance.

The kinetic energy barrier of the initial water dissociation step ( $\Delta G_{\text{H}_2\text{O}}$ ) is applied as an activity descriptor for HER under alkaline condition, which can be calculated as follows:

$$\Delta G_{\text{H}_2\text{O}} = G_{\text{ts}} - G_{\text{ini}} \quad (3)$$

where  $G_{\text{ts}}$  and  $G_{\text{ini}}$  are the free energy of the transient state and the initial state for water dissociation, respectively. The climbing image nudged elastic band (CI-NEB) method and dimer method implemented in VASP was used to determine the diffusion energy barrier and the minimum energy pathways.<sup>S5, S6</sup>

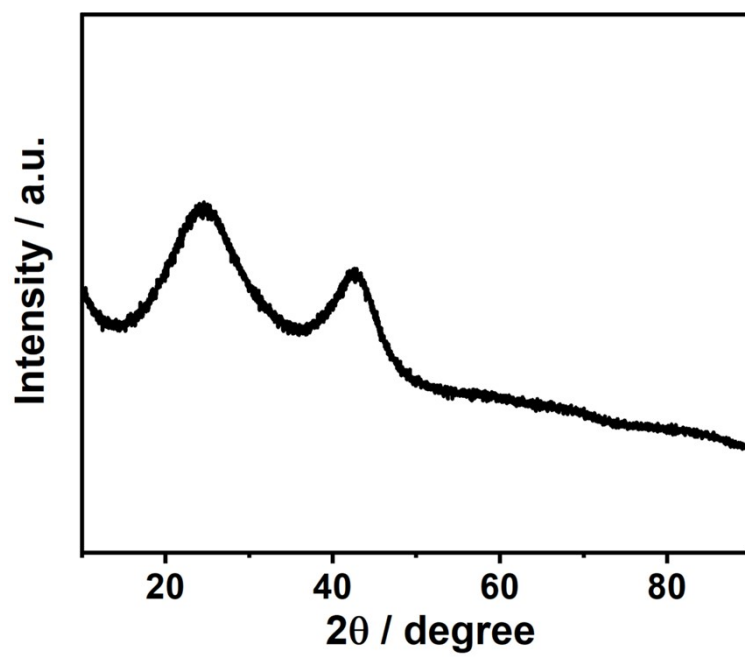

**Fig. S1.** The XRD patterns of Ru/NC.

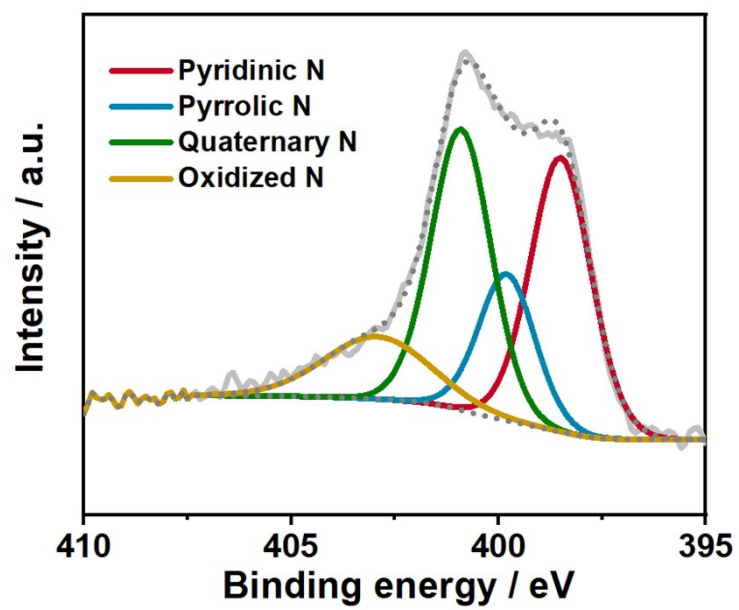

**Fig. S2.** The N 1s XPS spectra of Ru/C.

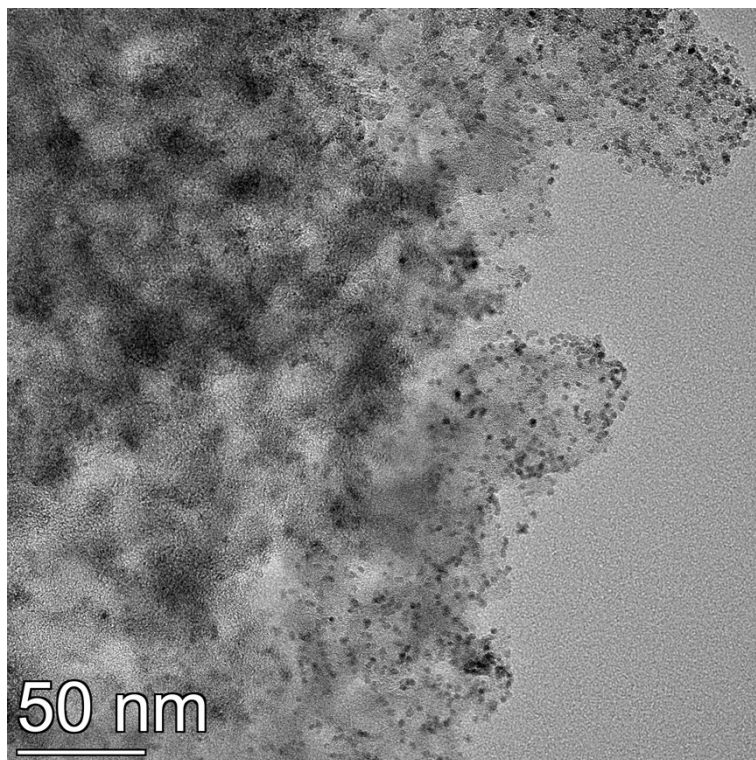

**Fig. S3.** The TEM image of Ru/NC.

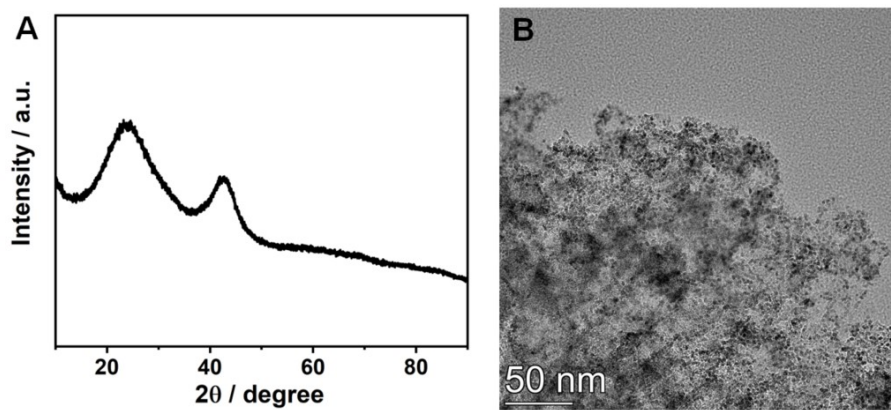

**Fig. S4.** (A) XRD pattern and (B) TEM image of Ru/BC.



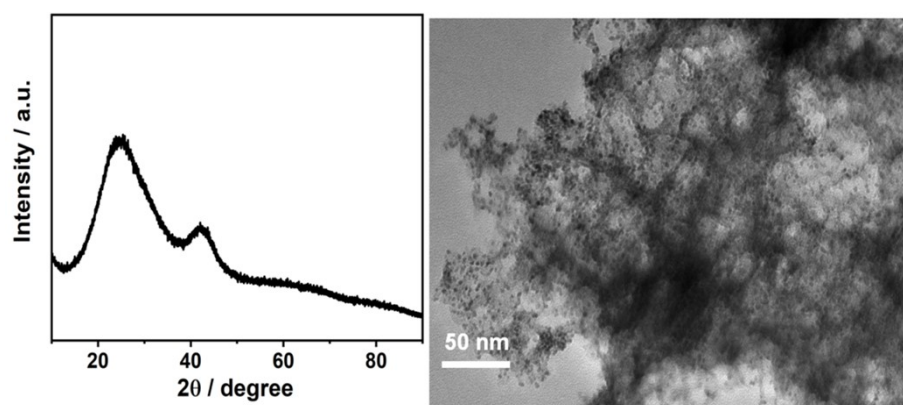

**Fig. S5.** (A) XRD pattern and (B) TEM image of Ru/C.

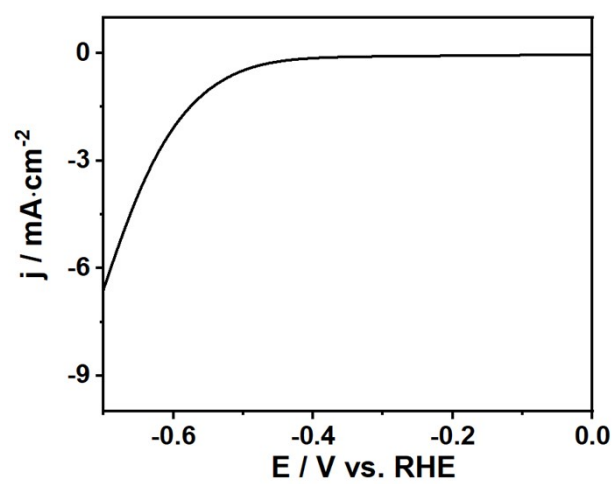

**Fig. S6.** The LSV curves of NBC in 1.0 M KOH.

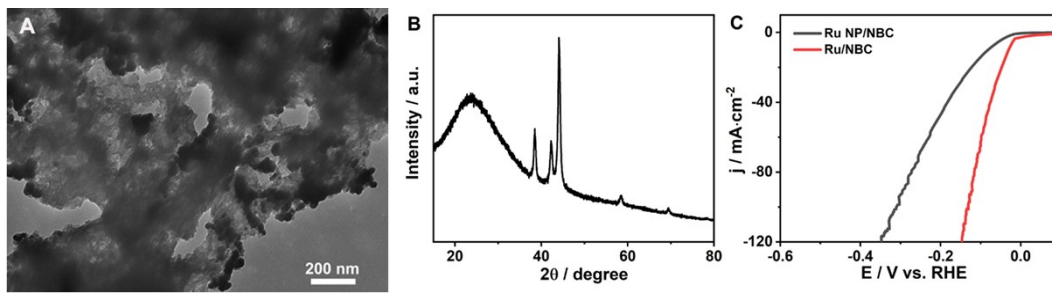

**Fig. S7.** (A) TEM image of Ru NP/NBC, (B) XRD pattern of Ru NP/NBC, and (C) LSV curve of Ru NP/NBC in 1.0 M KOH.

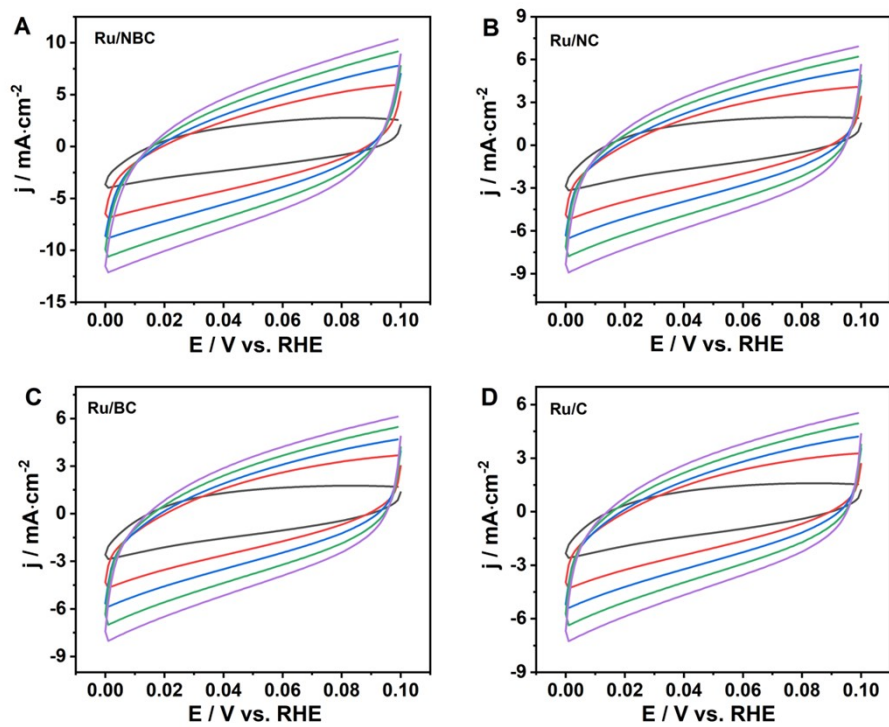

**Fig. S8.** The CV curves of (A) Ru/NBC, (B) Ru/NC, (C) Ru/BC and (D) Ru/C in  $1.0\text{ M KOH}$  at scan rate of  $20, 60, 100, 140$  and  $180\text{ mV}\cdot\text{s}^{-1}$ .

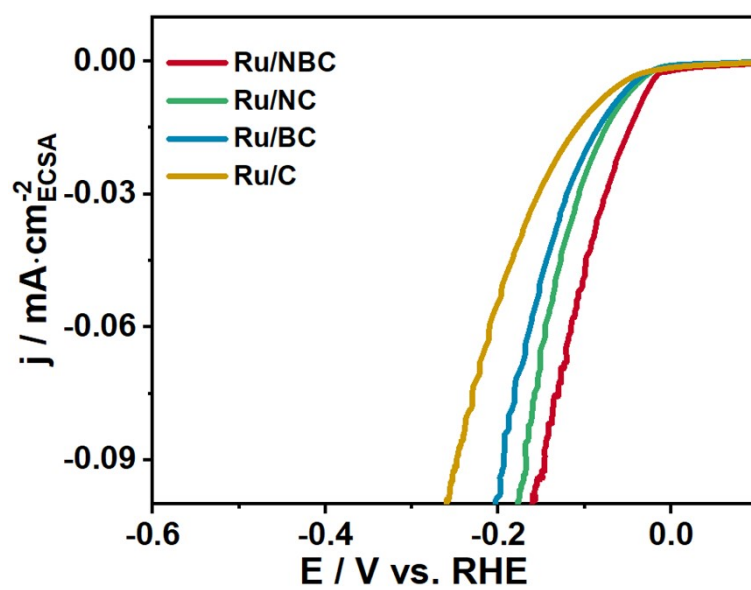

**Fig. S9.** Specific activity of as-prepared electrocatalysts.

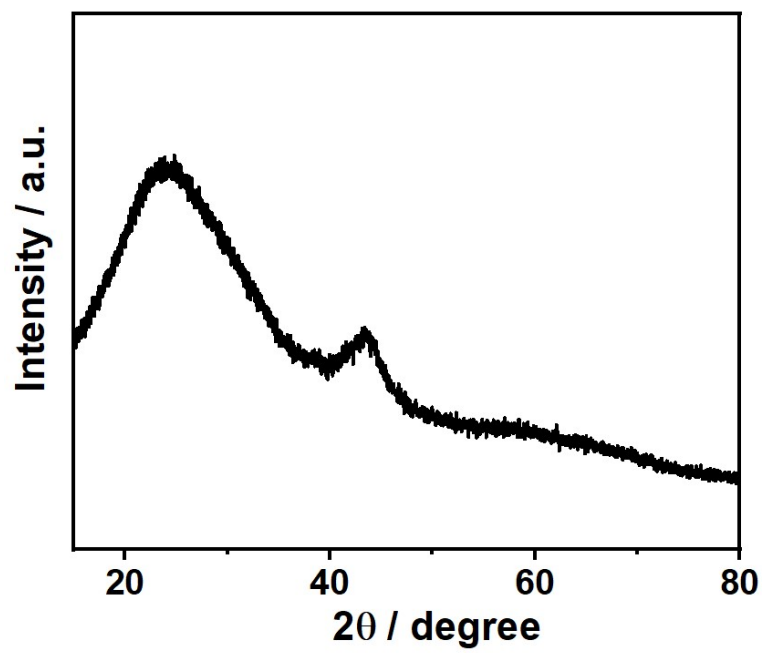

**Fig. S10.** XRD pattern of Ru/NBC after V-t test in 1.0 M KOH.

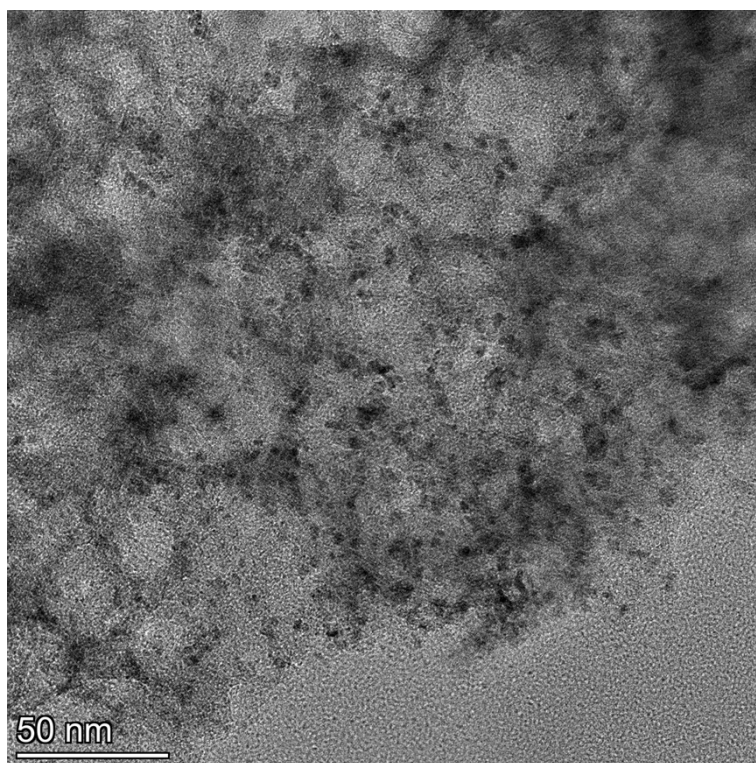

**Fig. S11.** TEM image of Ru/NBC after V-t test in 1.0 M KOH.

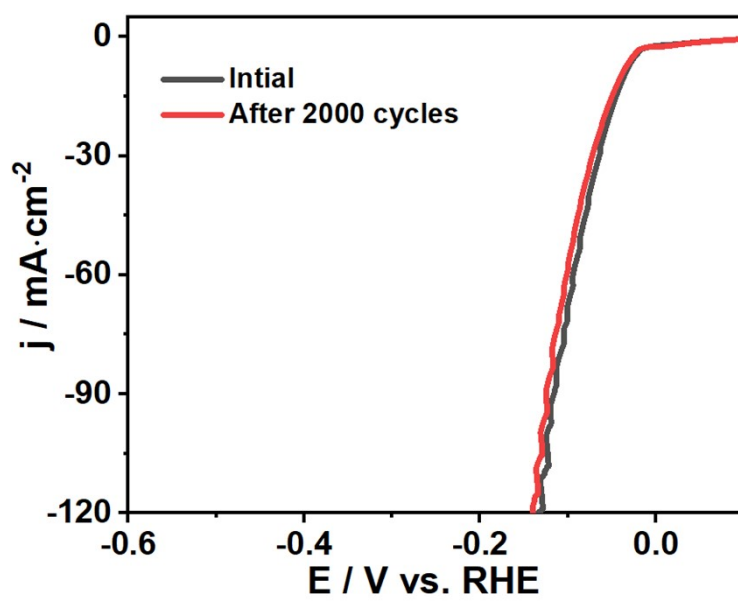

**Fig. S12.** LSV curves of Ru/NBC before and after CV test in 1.0 M KOH.



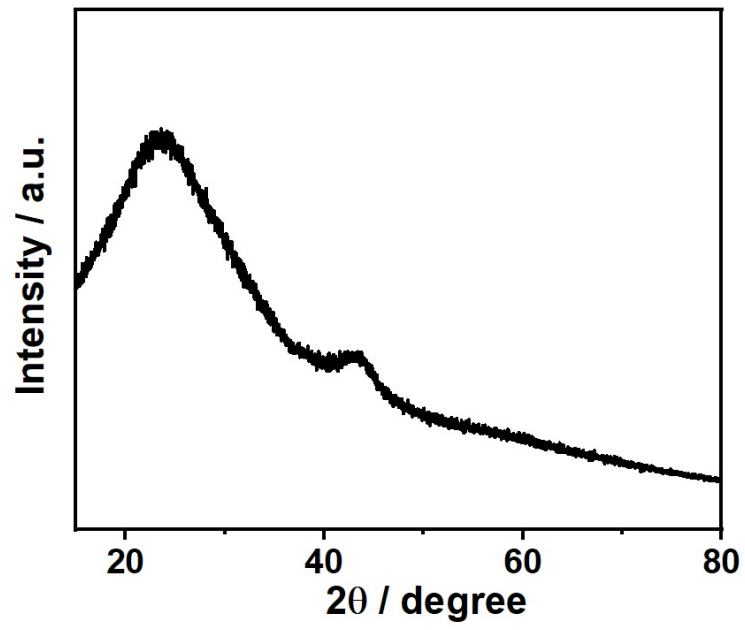

**Fig. S13.** XRD pattern of Ru/NBC after CV test in 1.0 M KOH.

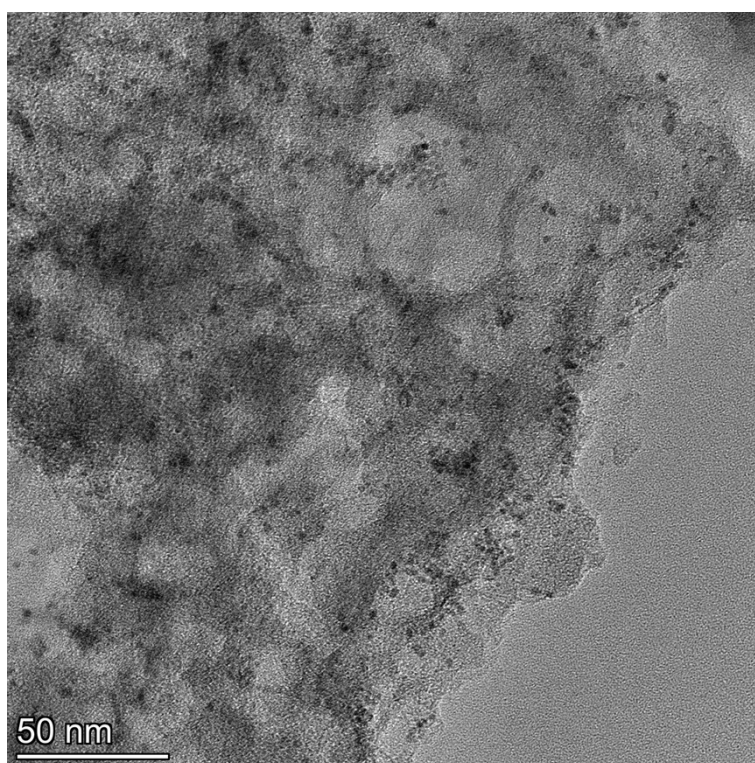

**Fig. S14.** TEM image of Ru/NBC after CV test in 1.0 M KOH.

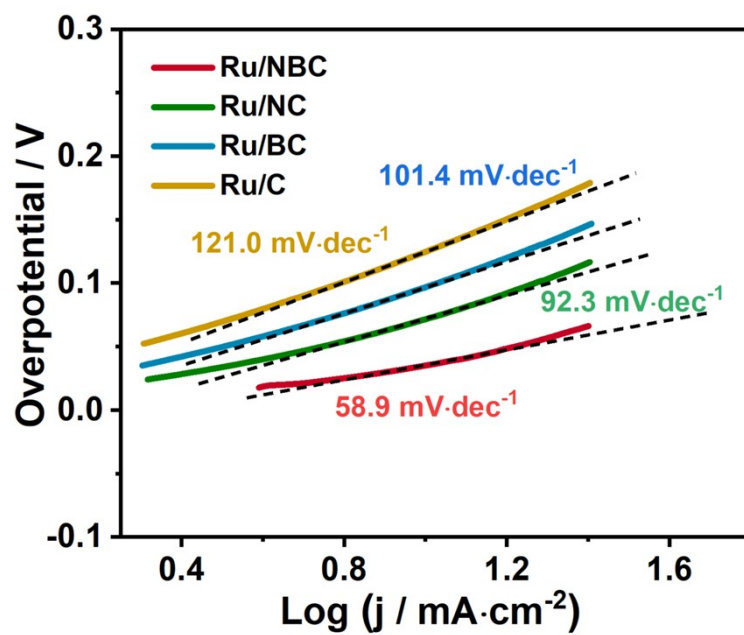

**Fig. S15.** The Tafel slope of as-prepared electrocatalysts in alkaline seawater.

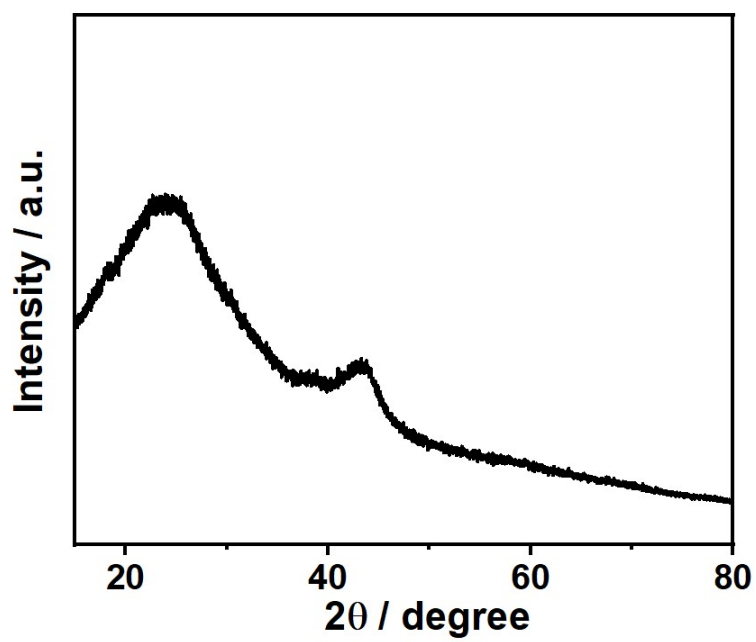

**Fig. S16.** XRD pattern of Ru/NBC after V-t test in 1.0 M KOH + seawater.

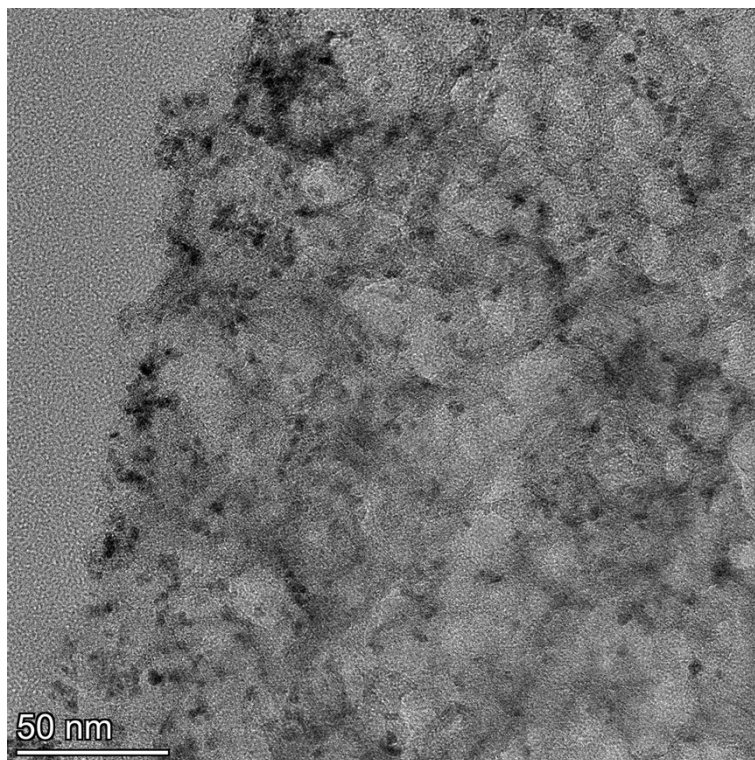

**Fig. S17.** TEM image of Ru/NBC after V-t test in 1.0 M KOH + seawater.

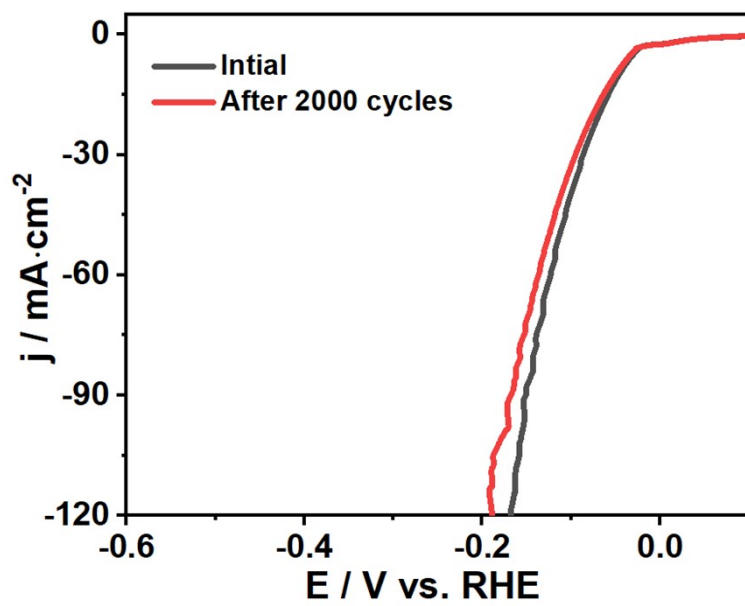

**Fig. S18.** LSV curves of Ru/NBC before and after CV test in 1.0 M KOH + seawater.

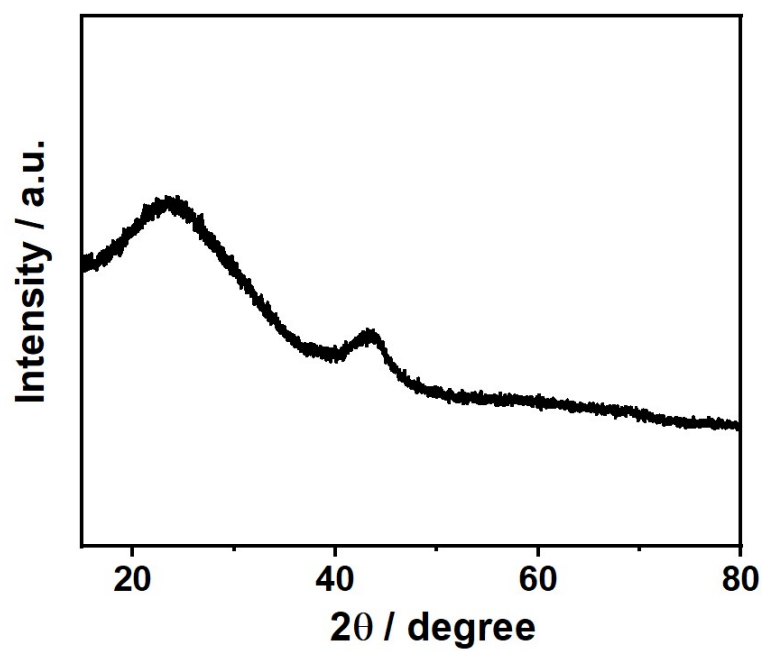

**Fig. S19.** XRD pattern of Ru/NBC after CV test in 1.0 M KOH + seawater.

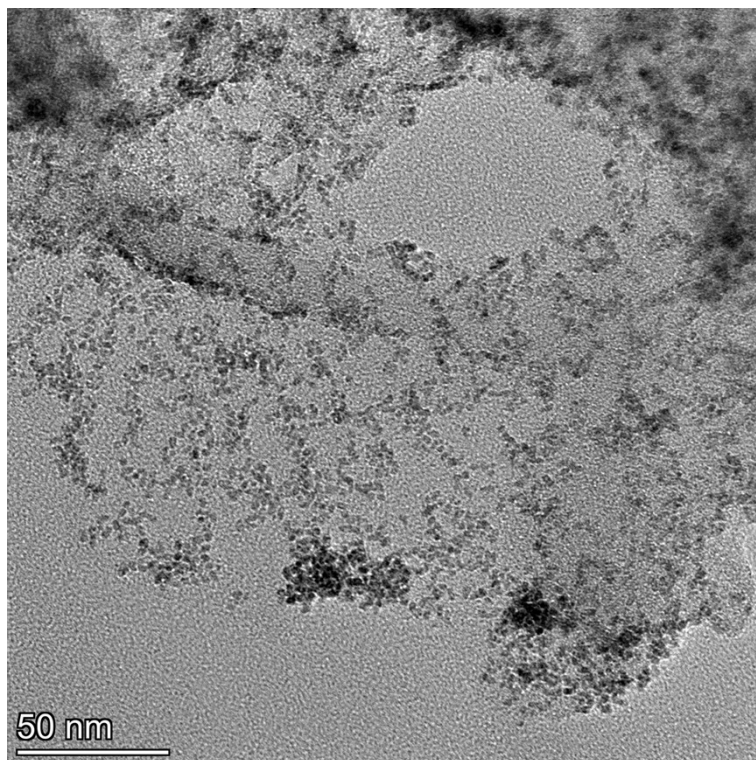

**Fig. S20.** TEM image of Ru/NBC after CV test in 1.0 M KOH + seawater.



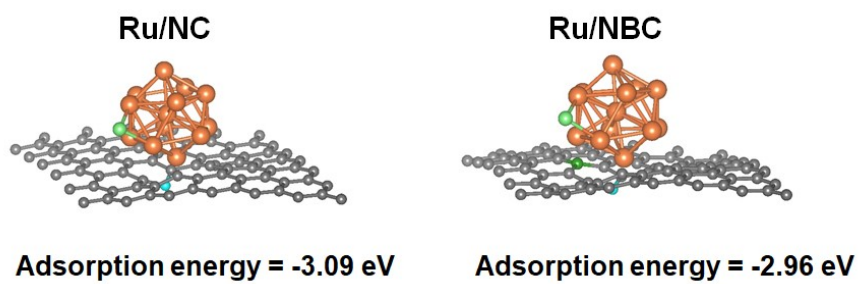

**Fig. S21.** The adsorption energy of Cl<sup>-</sup> on Ru/NC and Ru/NBC surface.

**Table S1.** Comparison of HER activity among Ru based electrocatalysts with Ru/NBC in alkaline media.

| Catalysts                                   | Overpotential at<br>10 mA·cm <sup>-2</sup> (mV) | Tafel slope<br>(mV·dec <sup>-1</sup> ) | Reference                                           |
|---------------------------------------------|-------------------------------------------------|----------------------------------------|-----------------------------------------------------|
| <b>Ru/NBC</b>                               | <b>30</b>                                       | <b>41.4</b>                            | <b>This work</b>                                    |
| Ru NCs/BNG.                                 | 14                                              | 28.9                                   | Nano Energy, 2020, 68, 104301                       |
| RuNP@RuN <sub>x</sub> -OFC/NC               | 19                                              | 35.5                                   | Appl. Catal. B Environ., 2022, 307, 121193.         |
| RuCo@NC-600                                 | 36                                              | 39                                     | J. Mater. Chem. A, 2020,8, 12810-12820              |
| Ru/D-NPC                                    | 23                                              | 38                                     | Appl. Catal. B Environ., 2022, 306, 121095          |
| Ru@Ni-MOF                                   | 22                                              | 40                                     | Angew. Chem. Int. Ed., 2021, 60, 22276-22282        |
| Ru MNSs                                     | 24                                              | 22.3                                   | Angew. Chem. Int. Ed., 2022, 61, e2021168.          |
| NiRu <sub>0.13</sub> -BDC                   | 34                                              | 32                                     | Nat. Commun., 2021, 12, 1369.                       |
| Ru <sub>NP</sub> -Ru <sub>SA</sub> @CFN-800 | 33                                              | 37.16                                  | Adv. Funct. Mater., 2023, 33, 2213058               |
| V <sub>O</sub> -Ru/HfO <sub>2</sub> -OP     | 39                                              | 29                                     | Nat. Commun., 2022, 13, 1270.                       |
| Ru <sub>1+NPs</sub> /N-C                    | 39                                              | 27.6                                   | ACS Appl. Mater. Interfaces, 2022, 14, 15250–15258  |
| Ru SAs/N-Mo <sub>2</sub> C NSs              | 43                                              | 38.67                                  | Appl. Catal. B Environ., 2020, 277, 119236          |
| Ru ND/C                                     | 43.4                                            | 49                                     | Chem. Commun., 2018, 54, 4613-4616                  |
| Ru@1T-MoS <sub>2</sub> -MXene               | 44                                              | 47                                     | Adv. Funct. Mater., 2023, 2212514                   |
| Ru-NiCoP/NF                                 | 44                                              | 45.4                                   | Appl. Catal. B Environ., 2020, 279, 119396.         |
| Ru@Co/N-CNTs-2                              | 48                                              | 43                                     | ACS Sustainable Chem. Eng., 2020, 8, 24, 9136-9144. |
| Ru <sub>1</sub> CoP/CDs-1000                | 51                                              | 73.7                                   | Angew. Chem. Int. Ed., 2021, 60, 7234-7244          |
| SA-Ru-MoS <sub>2</sub>                      | 76                                              | 21                                     | Small Methods, 2019, 1900653                        |
| RuP <sub>2</sub> @PC                        | 78.9                                            | 36.7                                   | J. Mater. Chem. A, 2021, 9, 12276-12282.            |
| PtRu/CC-P                                   | 44                                              | 45.1                                   | Nanoscale, 2022, 14, 15942–15949                    |
| Cu <sub>2-x</sub> S@Ru NPs                  | 82                                              | 48                                     | Small, 2017, 13, 1700052                            |

**Table S2.** Comparison of HER activity among Ru based electrocatalysts with Ru/NBC in alkaline seawater.

| <b>Catalysts</b>                                       | <b>Overpotential at<br/>10 mA·cm<sup>-2</sup> (mV)</b> | <b>Tafel slope<br/>(mV·dec<sup>-1</sup>)</b> | <b>Reference</b>                                      |
|--------------------------------------------------------|--------------------------------------------------------|----------------------------------------------|-------------------------------------------------------|
| <b>Ru/NBC</b>                                          | <b>35</b>                                              | <b>58.9</b>                                  | <b>This work</b>                                      |
| Ru <sub>1</sub> +NPs/N-C                               | 58                                                     | -                                            | ACS Appl. Mater. Interfaces, 2022,<br>14, 15250–15258 |
| Ni-SA/NC                                               | 139                                                    | 61                                           | Adv. Mater., 2021, 33, 2003846                        |
| 1D-Cu@Co-CoO/<br>Rh                                    | 137.7                                                  | 124.8                                        | Small, 2021, 17, 2103826                              |
| cRu-Ni <sub>3</sub> N/NF                               | 36                                                     | -                                            | Energy Environ. Mater., 2023, 6,<br>e12318            |
| l-Rh metallene                                         | 38                                                     | 39.0                                         | Appl. Catal. B Environ., 2022, 310,<br>121338         |
| c-Rh metallene                                         | 49                                                     | 45.3                                         | Appl. Catal. B Environ., 2022, 310,<br>121338         |
| Ru <sub>2</sub> P@Ru/CNT                               | 29                                                     | -                                            | Chin. J. Catal., 2022, 43, 1148-1155.                 |
| Ni-MoN                                                 | 29                                                     | -                                            | Adv. Mater., 2022, 34, 2201774                        |
| Ni <sub>3</sub> N/W <sub>5</sub> N <sub>4</sub>        | 36                                                     | 43                                           | Appl. Catal. B Environ., 2022, 307,<br>121198.        |
| NiFeP-NS                                               | 59                                                     | 97.0                                         | Appl. Catal. B Environ., 2022, 302,<br>120862         |
| Ru <sub>1,n</sub> -ZnFe <sub>2</sub> O <sub>x</sub> -C | 15.9                                                   | -                                            | Small, 2022, 18, 2204155                              |

## References

S1 G. Kresse, *Phys. Rev. B*, 1996, **54**, 11169.

S2 G. K. J. Furthmüller, *Phys. Rev. B*, 1999, **54**, 11169.

S3 K. Momma, F. Izumi, *J. Appl. Crystallography*, 2008, 41, 653.

S4 J. K. Nørskov, T. Bligaard, A. Logadottir, J. R. Kitchin, J. G. Chen, S. Pandelov, U. Stimming, *J. Electrochem. Soc.*, 2005, **152**, J23

S5 B. P. U. Graeme Henkelman, J. Harnes, *J. Chem. Phys.*, 2000, **113**, 9901.

S6 A. H. J. Graeme Henkelman, *J. Chem. Phys.*, 1999, **111**, 7010.
